# Supplementary material for: Cassava Witches’ Broom Disease in Southeast Asia: A Review of Its Distribution and Associated Symptoms
Source: MDPI journal article supplement (doi:10.3390/plants12112217), 2023-06-04
Supplement: s1 [file s1]

**Supplementary Table S1. Field surveys for CWBD in Southeast Asia.** Incidence of CWBD in Vietnam, Lao PDR and Cambodia recorded in 2014 [4] and during routine surveys in 2020 by national plant protection officers in Vietnam, Lao PDR and Cambodia. One every fourth plant (60 plants per field) was inspected and photographed following an X pattern, covering an area of 1 ha. % incidence indicates the average number of symptomatic plants per field per province in the sample (60 plants). 0 = none of the plants surveyed showed CWBD symptoms in any of the surveyed fields. The number next to province names indicates the number of fields inspected in each province.

| Country  | Region | Province (# fields)<br>2014 | % Incidence<br>(SE) 2014 | Province (# fields)<br>2020 | % Incidence<br>(SE) 2020 |
|----------|--------|-----------------------------|--------------------------|-----------------------------|--------------------------|
| Vietnam  | North  | -                           | -                        | Bac Giang (5)               | 0                        |
|          |        | -                           | -                        | Dien Bien (4)               | 0                        |
|          |        | -                           | -                        | Hoa Binh (3)                | 0                        |
|          |        | -                           | -                        | Lai Chau (4)                | 0                        |
|          |        | -                           | -                        | Lang Son (4)                | 0                        |
|          |        | -                           | -                        | Lao Cai (4)                 | 0                        |
|          |        | -                           | -                        | Nghe An (12)                | 0                        |
|          |        | -                           | -                        | Phu Tho (5)                 | 0                        |
|          |        | -                           | -                        | Son La (16)                 | 0                        |
|          |        | -                           | -                        | Thai Nguyen (4)             | 0                        |
|          |        | -                           | -                        | Thanh Hoa (8)               | 0                        |
|          |        | -                           | -                        | Tuyen Quang (4)             | 0                        |
|          |        | -                           | -                        | Yen Bai (12)                | 0                        |
|          | Center |                             |                          | Binh Dinh (4)               | 0                        |
|          |        | Đắk Lắk (20)                | 15.00                    | Đắk Lắk (5)                 | 0                        |
|          |        | -                           | -                        | Gia Lai (36)                | 0.046                    |
|          |        | -                           | -                        | Kon Tum (3)                 | 0                        |
|          |        | Phú Yên (19)                | 27.053                   | Phú Yên (11)                | 0                        |
|          |        | -                           | -                        | Quảng Bình (4)              | 0                        |
|          |        | -                           | -                        | Quảng Nam (8)               | 1.875                    |
|          |        | Quang Ngai (20)             | 27.31                    | Quang Ngai (12)             | 0                        |
|          |        | -                           | -                        | Quảng Trị (8)               | 0                        |
|          |        | -                           | -                        | Thừa Thiên Huế (4)          | 0                        |
|          | South  | Ba Ria – Vung Tau (20)      | 12.5                     | Ba Ria – Vung Tau (4)       | 0                        |
|          |        | -                           | -                        | Binh Duong (4)              | 2.083                    |
|          |        | Binh Phuoc (21)             | 1.24                     | Binh Phuoc (12)             | 0                        |
|          |        | -                           | -                        | Bình Thuận (20)             | 0                        |
|          |        | -                           | -                        | Đak Nông (8)                | 0                        |
|          |        | Dong Nai (20)               | 14.8                     | Dong Nai (5)                | 0                        |
|          |        | -                           | -                        | Khánh Hòa (5)               | 0                        |
|          |        | -                           | -                        | Phu My (4)                  | 0                        |
|          |        | Tay Ninh (21)               | 0.7                      | Tay Ninh (28)               | 0                        |
| Lao PDR  | North  | -                           | -                        | LaoungNamTha (2)            | 0                        |
|          |        | Saiyabouly (20)             | 17.0                     | Saiyabouly (8)              | 0                        |
|          |        | Vientiane (22)              | 12.0                     | Vientiane (3)               | 0                        |
|          |        | Xiangkhouang (6)            | 8.67                     | -                           | -                        |
|          |        | -                           | -                        | Xaysomboun (3)              | 6.111                    |
|          | Center | Bolikhamsai (24)            | 25.79                    | Bolikhamsai (11)            | 2.879                    |
|          |        | -                           | -                        | Khammoun (1)                | 1.667                    |
|          | South  | Champasack (25)             | 28.24                    | Champasack (24)             | 0.625                    |
|          |        | Salavan (25)                | 9.6                      | Salavan (7)                 | 5.952                    |
|          |        | -                           | -                        | Sekong (1)                  | 3.448                    |
|          |        | -                           | -                        | Attapue (6)                 | 0.833                    |
|          |        | -                           | -                        | -                           | -                        |
| Cambodia | North  | -                           | -                        | Preah Vihear (4)            | 0                        |
|          |        | Banteay Meanchey (20)       | 1.2                      | Banteay Meanchey (24)       | 0                        |
|          |        | -                           | -                        | Oddor Meanchey (16)         | 0                        |
|          |        | -                           | -                        | Rattanakiri (4)             | 0                        |
|          |        | -                           | -                        | Steung Treng (4)            | 0                        |
|          |        | -                           | -                        | Siem Reap (8)               | 0                        |
|          | Center | Battambang (20)             | 32.3                     | Battambang (26)             | 0                        |
|          |        | Pailin (19)                 | 38.42                    | Pailin (10)                 | 0.167                    |
|          |        | -                           | -                        | Kampong Thom (12)           | 0                        |
|          |        | Kratie (20)                 | 56.3                     | Kratie (18)                 | 0.093                    |
|          |        | -                           | -                        | Mondulkiri (4)              | 0                        |
|          |        | Kampong Cham (20)           | 54.3                     | Kampong Cham (4)            | 0                        |
|          | South  | -                           | -                        | Pursat (4)                  | 0                        |
|          |        | -                           | -                        | Tboung Khmum (12)           | 0.139                    |
|          |        | -                           | -                        | -                           | -                        |
