# Supplementary material for: Cassava Witches’ Broom Disease in Southeast Asia: A Review of Its Distribution and Associated Symptoms
Source: MDPI journal article supplement (doi:10.3390/plants12112217), 2023-06-04
Supplement: s1 [file s1]

| Phenotype                       | PCR (-) | PCR (+) | Total |
|---------------------------------|---------|---------|-------|
| Healthy                         | 427     | 17      | 444   |
| Classic witches' broom symptoms | 12      | 22      | 34    |
| Total                           | 439     | 39      | 478   |

**B**

Phytoplasma 16Sr groups

other bacteria

other  
bacteria
